# Supplementary material for: Deep Eutectic Solvents as Novel and Effective Extraction Media for Quantitative Determination of Ochratoxin A in Wheat and Derived Products
Source: MDPI journal article supplement (doi:10.3390/molecules22010121), 2017-01-12
Supplement: s1 [file s1]

# Supplementary Materials: Deep Eutectic Solvents as Novel and Effective Extraction Media for Quantitative Determination of Ochratoxin A in Wheat and Derived Products

Luca Piemontese, Filippo Maria Perna, Antonio Logrieco, Vito Capriati and Michele Solfrizzo

**Table S1.** Recovery of OTA (durum wheat, seven levels, triplicate) using the new and the CEN-EN method. Precision values are expressed as RSD<sub>r</sub> (%).

| Spiking Level<br>( $\mu\text{g}/\text{kg}$ ) | New Method                         |                         |                 | CEN-EN Method                      |                         |                 |
|----------------------------------------------|------------------------------------|-------------------------|-----------------|------------------------------------|-------------------------|-----------------|
|                                              | OTA<br>( $\mu\text{g}/\text{kg}$ ) | RSD <sub>r</sub><br>(%) | Recovery<br>(%) | OTA<br>( $\mu\text{g}/\text{kg}$ ) | RSD <sub>r</sub><br>(%) | Recovery<br>(%) |
| 1.00                                         | 0.64 ± 0.03                        | 5                       | 64              | 1.00 ± 0.10                        | 10                      | 100             |
| 3.00                                         | 2.11 ± 0.12                        | 5                       | 70              | 3.00 ± 0.22                        | 7                       | 100             |
| 5.00                                         | 3.54 ± 0.04                        | 1                       | 71              | 4.60 ± 0.28                        | 6                       | 92              |
| 10.00                                        | 6.69 ± 0.49                        | 7                       | 67              | 8.68 ± 0.89                        | 10                      | 87              |
| 20.00                                        | 14.79 ± 1.54                       | 10                      | 74              | 18.18 ± 0.44                       | 2                       | 91              |
| 40.00                                        | 28.20 ± 1.43                       | 5                       | 70              | 35.74 ± 1.23                       | 3                       | 89              |
| 100.00                                       | 68.50 ± 8.32                       | 12                      | 69              | 90.92 ± 4.94                       | 5                       | 91              |

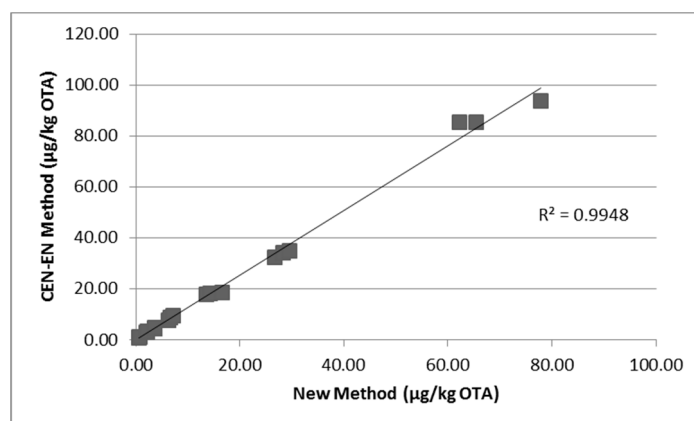

**Figure S1.** Correlation of OTA levels using the new and the CEN-EN method (durum wheat, seven levels, triplicate).

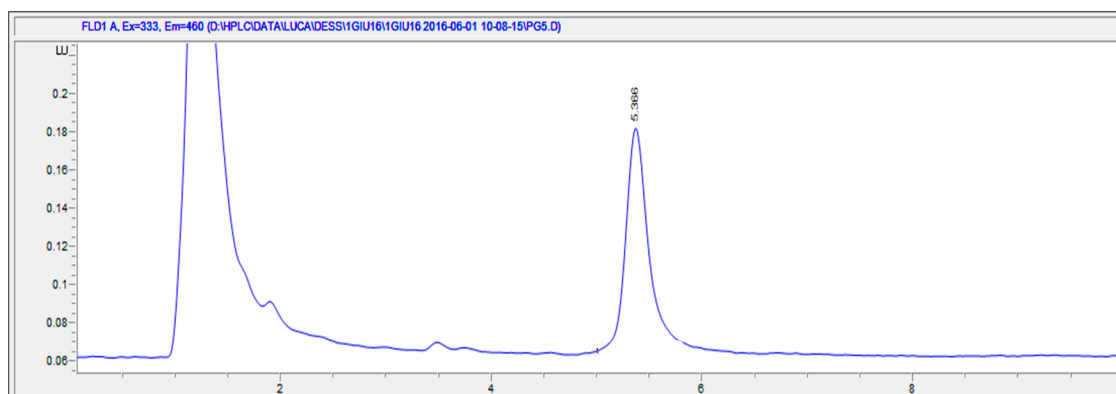

**Figure S2.** Chromatogram of a sample of bread crumbs contaminated at 3  $\mu\text{g}/\text{kg}$  with OTA (RT = 5.366 min) and analyzed with the new method.
